# Supplementary material for: IL-10 dampens antitumor immunity and promotes liver metastasis via PD-L1 induction
Source: PubMed Central journal article supplement — J Hepatol. 2024 Apr;80(4):634–44. doi: 10.1016/j.jhep.2023.12.015 (PMC10964083; doi:10.1016/j.jhep.2023.12.015), 2024-04
Supplement: mmc1.pdf [file mmc1.pdf]

# **IL-10 dampens antitumor immunity and promotes liver metastasis via PD-L1 induction**

Ahmad Mustafa Shiri, Tao Zhang, Tanja Bedke, Dimitra E. Zazara, Lilan Zhao, Jöran Lücke, Morsal Sabihi, Antonella Fazio, Siwen Zhang, Daniele V.F. Tauriello, Eduard Batlle, Babett Steglich, Jan Kempfski, Theodora Agaloti, Mikołaj Nawrocki, Yang Xu, Kristoffer Riecken, Imke Liebold, Leonie Brockmann, Leonie Konczalla, Lidia Bosurgi, Baris Mercanoglu, Philipp Seeger, Natalie Küsters, Panagis M. Lykoudis, Asmus Heumann, Petra C. Arck, Boris Fehse, Philipp Busch, Rainer Grotelüschen, Oliver Mann, Jakob R. Izbicki, Thilo Hackert, Richard A. Flavell, Nicola Gagliani, Anastasios D. Giannou, Samuel Huber

## Table of contents

|                                          |    |
|------------------------------------------|----|
| Fig. S1.....                             | 2  |
| Fig. S2 .....                            | 3  |
| Fig. S3.....                             | 5  |
| Fig. S4.....                             | 6  |
| Fig. S5.....                             | 7  |
| Fig. S6.....                             | 9  |
| Fig. S7.....                             | 10 |
| Supplementary materials and methods..... | 11 |
| Table S1 .....                           | 13 |
| Table S2 .....                           | 14 |

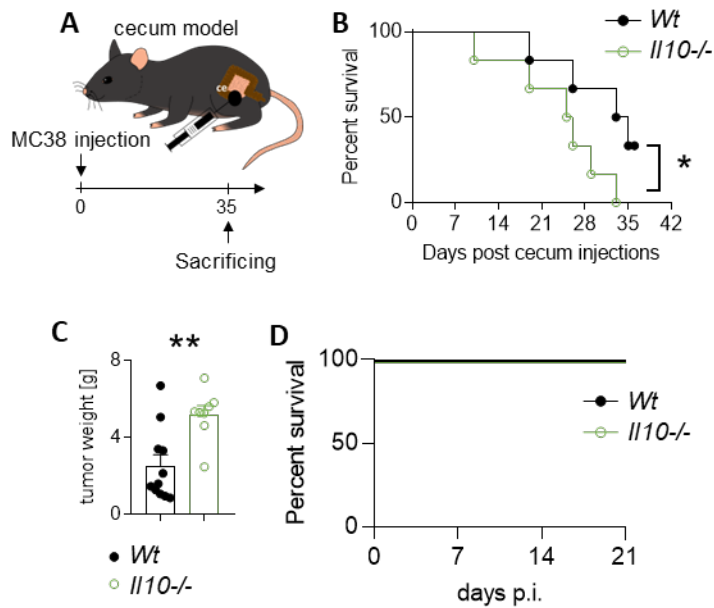

**Fig. S1: *I110*-deficiency in mouse promotes primary tumor growth**

(A) Schematic overview of the intracaecal injection of MC38 cancer cells for spontaneous liver metastasis induction. (B) Overall survival and (C) Primary tumor weight in the caecum of *Wt* and *I110*<sup>-/-</sup> mice (n ≥ 8 mice per group). (D) Overall survival of the mice after intrasplenic injection of MC38 cells. Data are presented as mean ± SEM. Non-significant (ns): p > 0.05; \*: p ≤ 0.05; \*\*: p < 0.01, as calculated by Mantel-Cox test or Mann-Whitney *U* test. p.i.: post injection

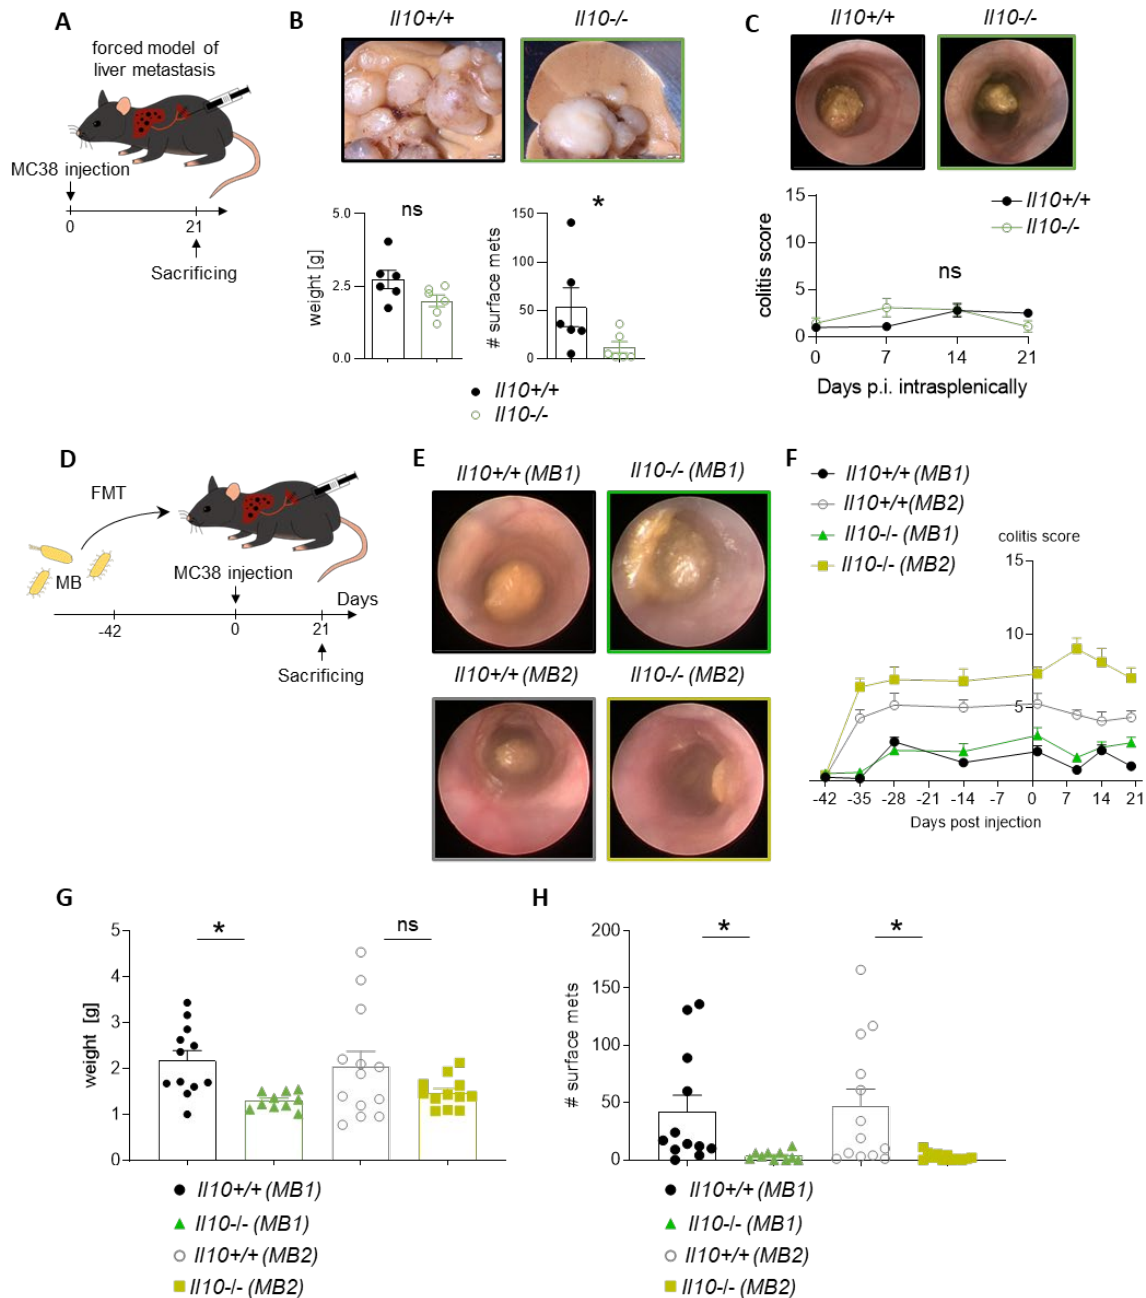

**Fig. S2: The pathogenic role of IL-10 in liver metastasis formation is independent of colitis severity**

(A) Schematic overview of the intrasplenic injection of MC38 cancer cells for forced liver metastasis induction in *Il10*<sup>+/+</sup> and *Il10*<sup>-/-</sup> littermates (n = 6 mice per group). (B) Representative pictures of liver metastasis, as well as analysis of liver weight and number of liver metastases. (C) Representative endoscopic view on day 21 and colitis score at different time points during liver metastasis formation. (D) Schematic overview of the i.s. injection of MC38 cancer cells for forced liver metastasis induction using *Il10*<sup>+/+</sup> and *Il10*<sup>-/-</sup> littermates following fecal microbiome (MB) transplant (MB1, MB2) (n ≥ 10 mice per group). (E) Representative endoscopic view of colon on day 21 post injection (i.s.) and (F) Colitis severity score at different time points during the whole

procedure. Livers were harvested and (**G**) liver weight as well as (**H**) number of microscopic liver metastases were analyzed. Scale bar: 2 mm. Data are presented as mean  $\pm$  SEM. Non-significant (ns):  $p > 0.05$ ; \*:  $p \leq 0.05$ ; \*\*:  $p < 0.01$ , as calculated by Mann-Whitney *U* test or by one-way ANOVA with Bonferroni post hoc tests. FMT: fecal microbiome transfer.

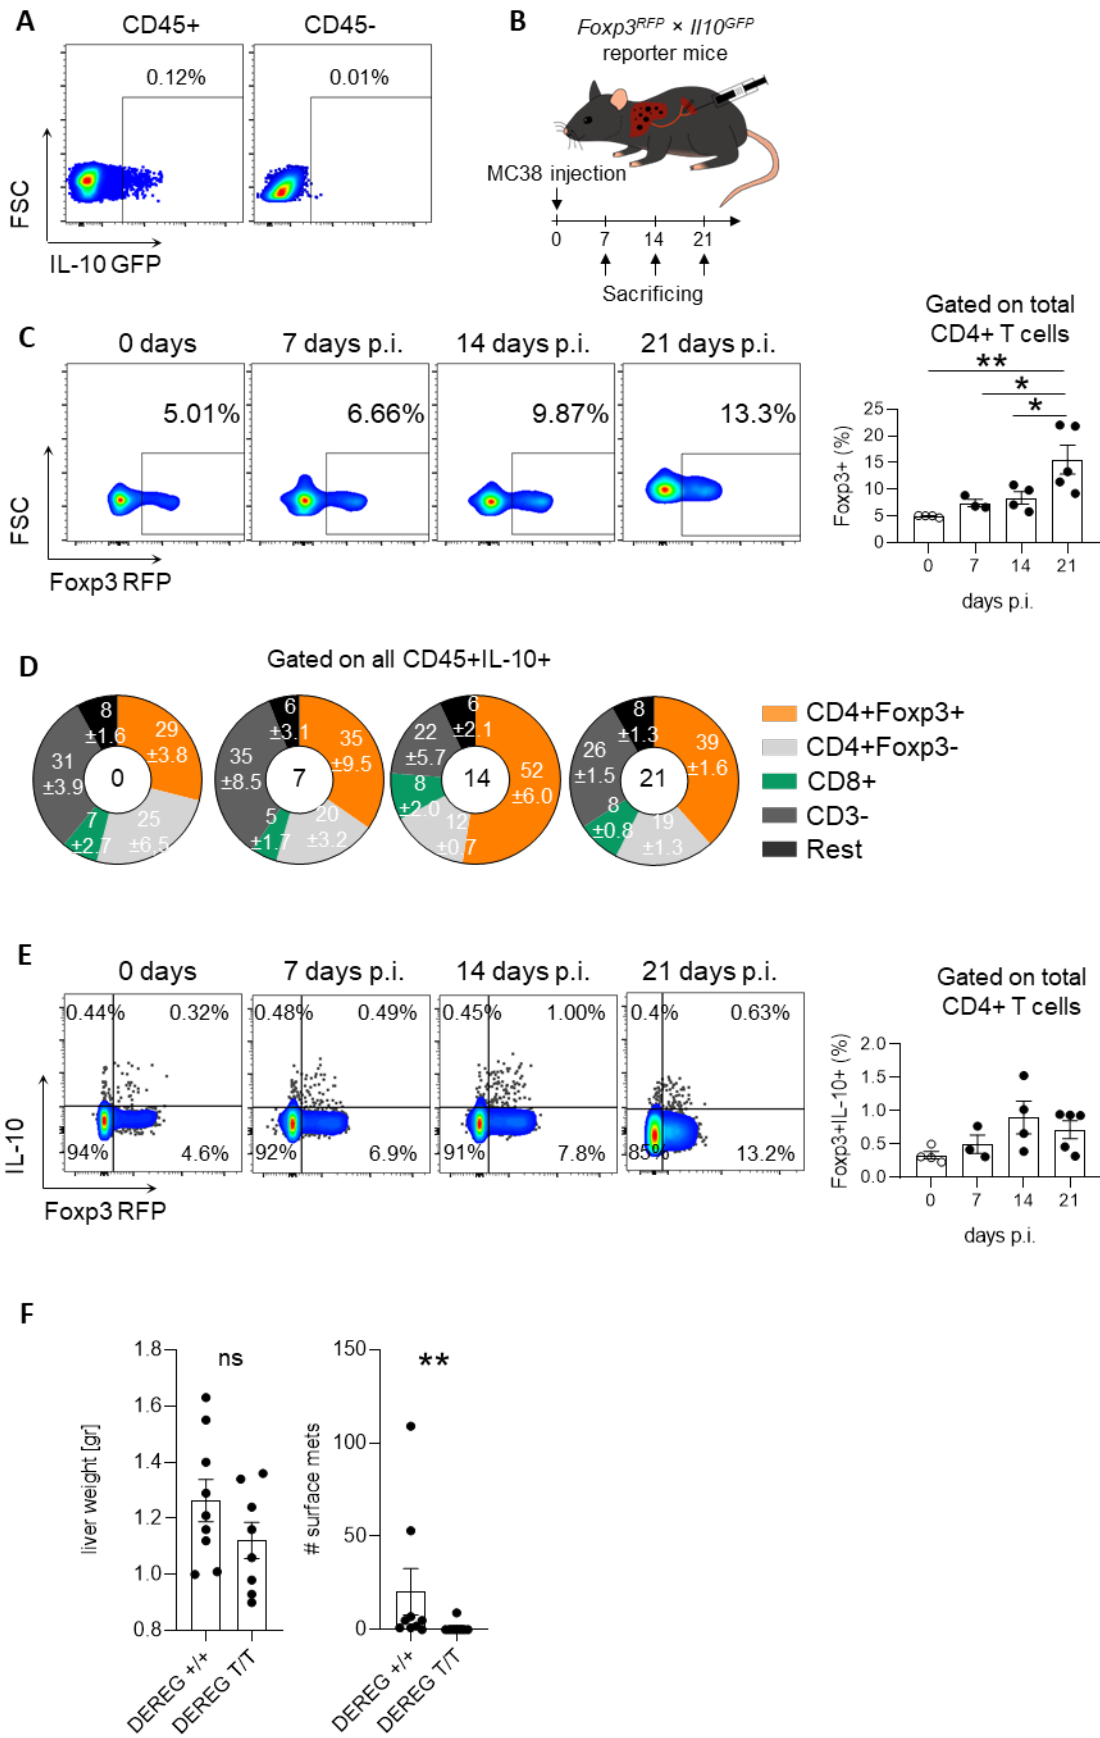

**Fig. S3: Treg expansion together with a dynamic IL-10 increase are observed during liver metastasis formation**

(A) IL-10 expression in hematopoietic and nonhematopoietic cells of a healthy mouse liver. (B) *Foxp3<sup>RFP</sup>;Il10<sup>GFP</sup>* reporter mice received MC38 colon cancer cells i.s. and were sacrificed at the indicated time points ( $n \geq 3$  mice per group). (C) Frequency of Tregs within CD4<sup>+</sup> T cells along metastasis formation. (D) General distribution of CD45<sup>+</sup>IL-10<sup>+</sup> cells at the indicated timepoints. (E) IL-10 producing Tregs along metastasis formation. (F) *Wild type* and *DEREG* mice received i.s. of MC38 cells and livers were harvested in 21 days post injection. Liver weight (left) and number of liver metastasis (right) in mice with Treg depletion and their controls. Data are presented as mean  $\pm$  SEM. Non-significant (ns):  $p > 0.05$ ; \*:  $p \leq 0.05$ ; \*\*:  $p < 0.01$ ; \*\*\*:  $p < 0.001$ , as calculated by one-way ANOVA with Bonferroni post hoc tests.

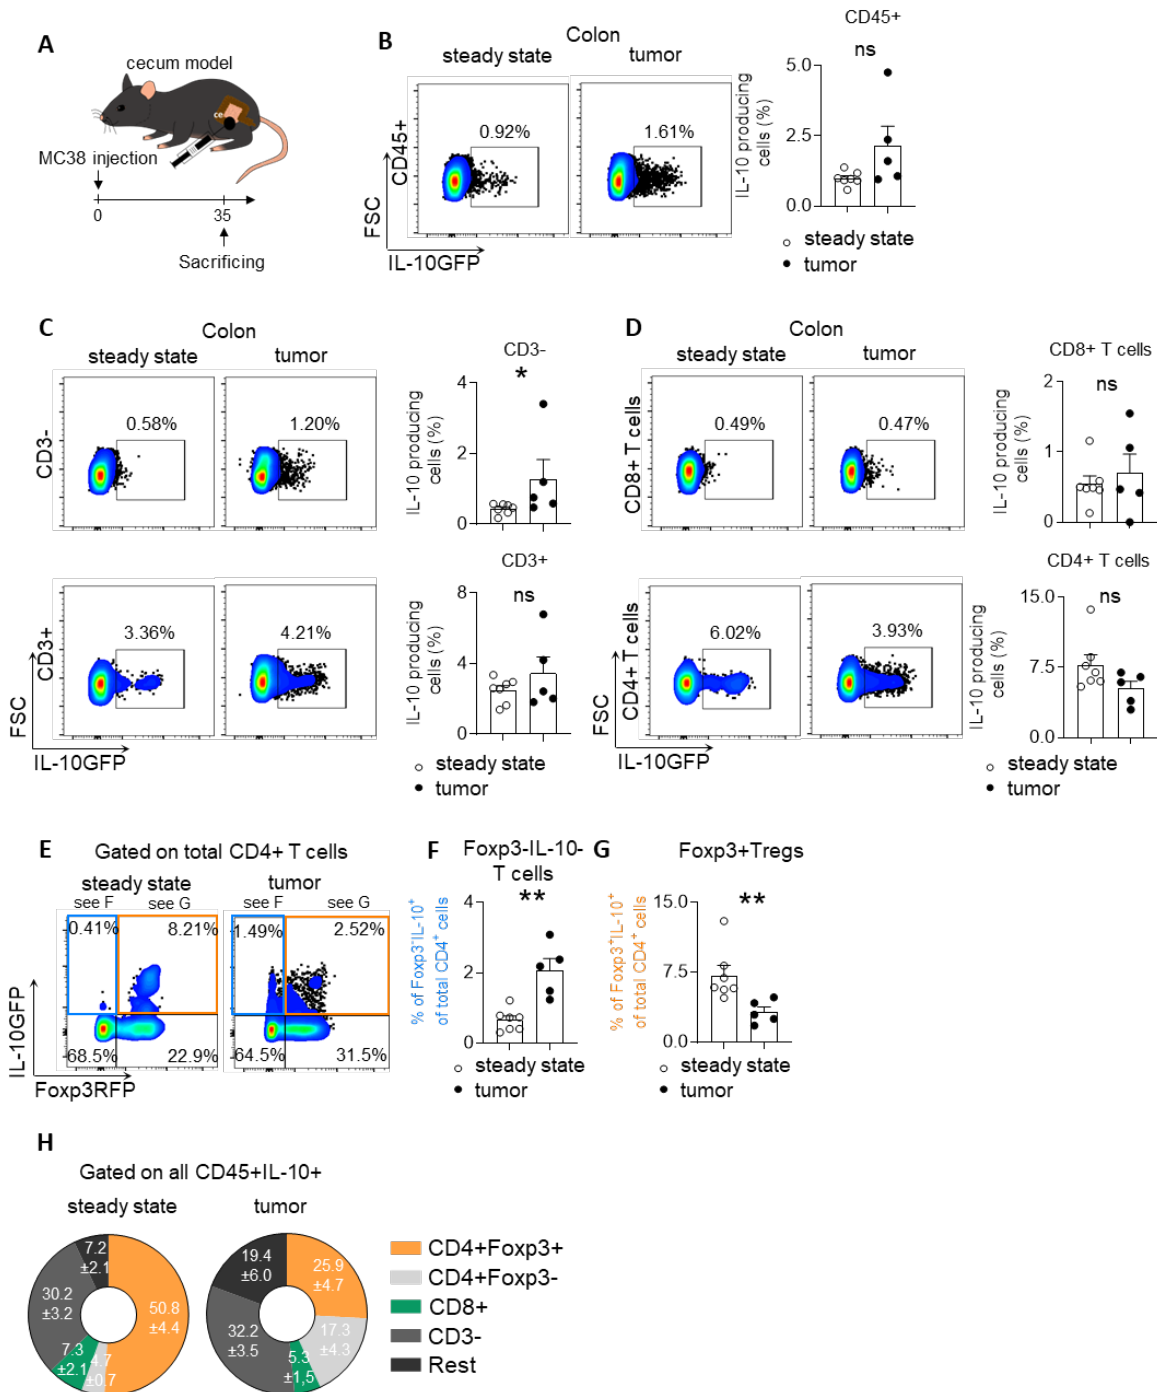

**Fig. S4: Innate cells are the major source of IL-10 producing cells in CRC**

(A) Schematic overview of the intracaecal injection of MC38 cancer cells for CRC induction in *Foxp3<sup>RFP</sup>;Il10<sup>GFP</sup>* reporter mice (n ≥ 5 mice per group). Immune cells from cecum were then isolated and stained for flow cytometry 35 days post injection. The frequency of IL-10+ cells in the fraction of (B) CD45+ cells, (C) CD3- and T cells, and in (D) CD8+ T cells and CD4+ T cells was analyzed. (E) IL-10 expression in (F) Foxp3-IL-10+ T cells and (G) Foxp3+Tregs. (H) General distribution of all IL-10 producing CD45+ cells in healthy cecum and cecum tumor. Data are presented as mean ± SEM. Non-significant (ns): p > 0.05; \*: p ≤ 0.05; \*\*: p < 0.01; \*\*\*: p < 0.001, as calculated by Mann-Whitney U test.

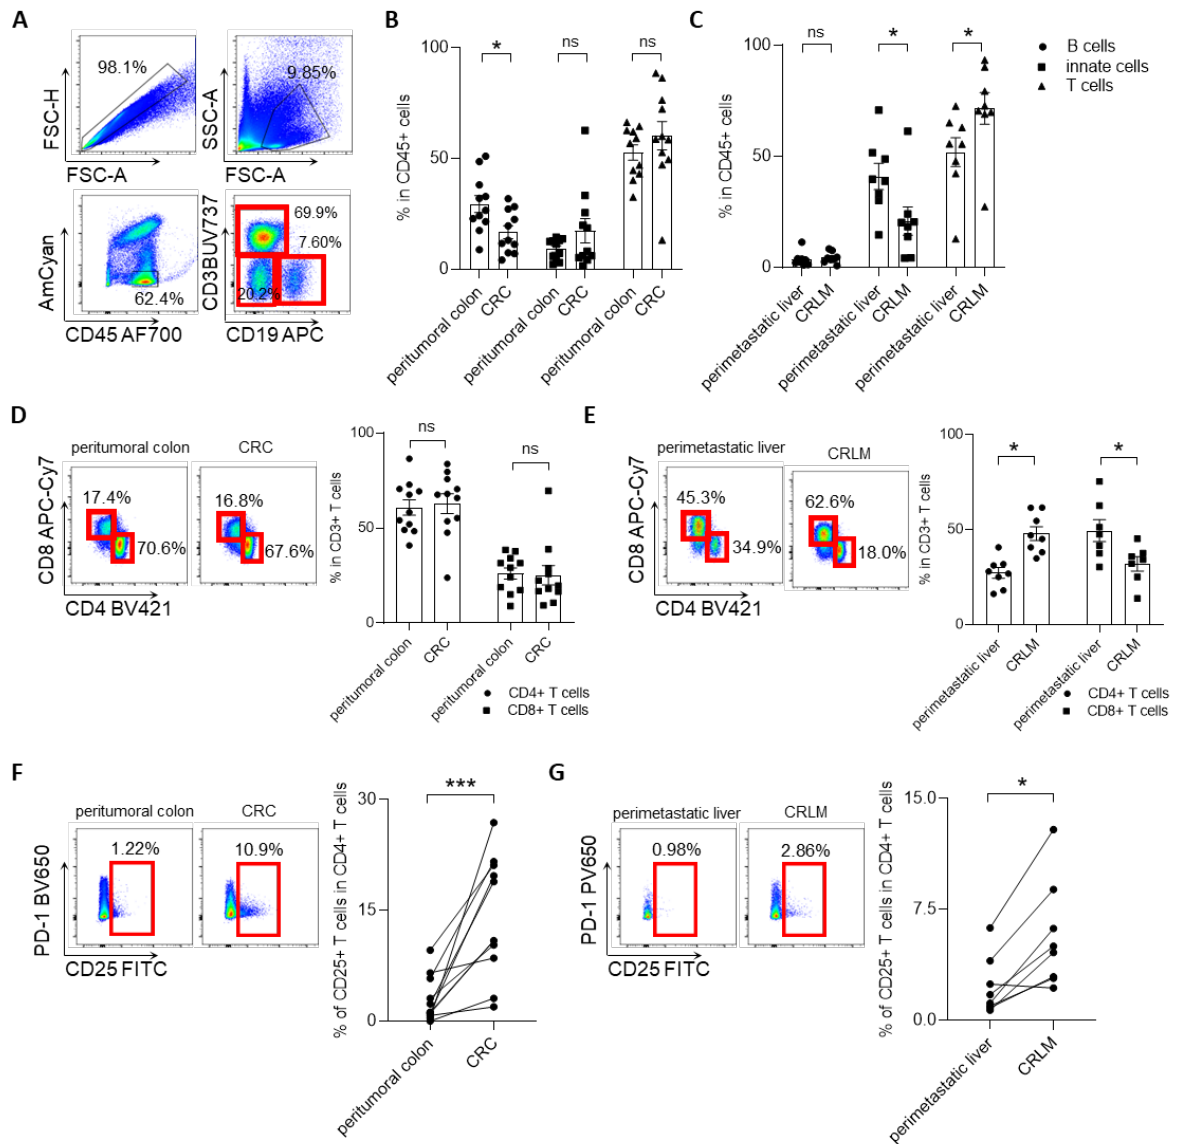

**Fig. S5:** Different immune cell compositions in CRC and CRLM. Immune cells were isolated from human CRC and CRLM, and subsequently stained for flow cytometry. (A) Gating strategy and analysis for B cells, innate cells and T cells in (B) CRC and (C) CRLM. (D, E) Representative FACS plots and analysis of CD4+ and CD8+ T cells in (D) CRC and (E) CRLM. (F, G) Representative FACS plots and analysis of CD4+CD25+ T cells in (D) CRC and (E) CRLM. Data are presented as mean  $\pm$  SEM. Non-significant (ns):  $p > 0.05$ ; \*:  $p \leq 0.05$ ; \*\*:  $p < 0.01$ ; \*\*\*:  $p < 0.001$ , as calculated by Mann-Whitney  $U$  test.



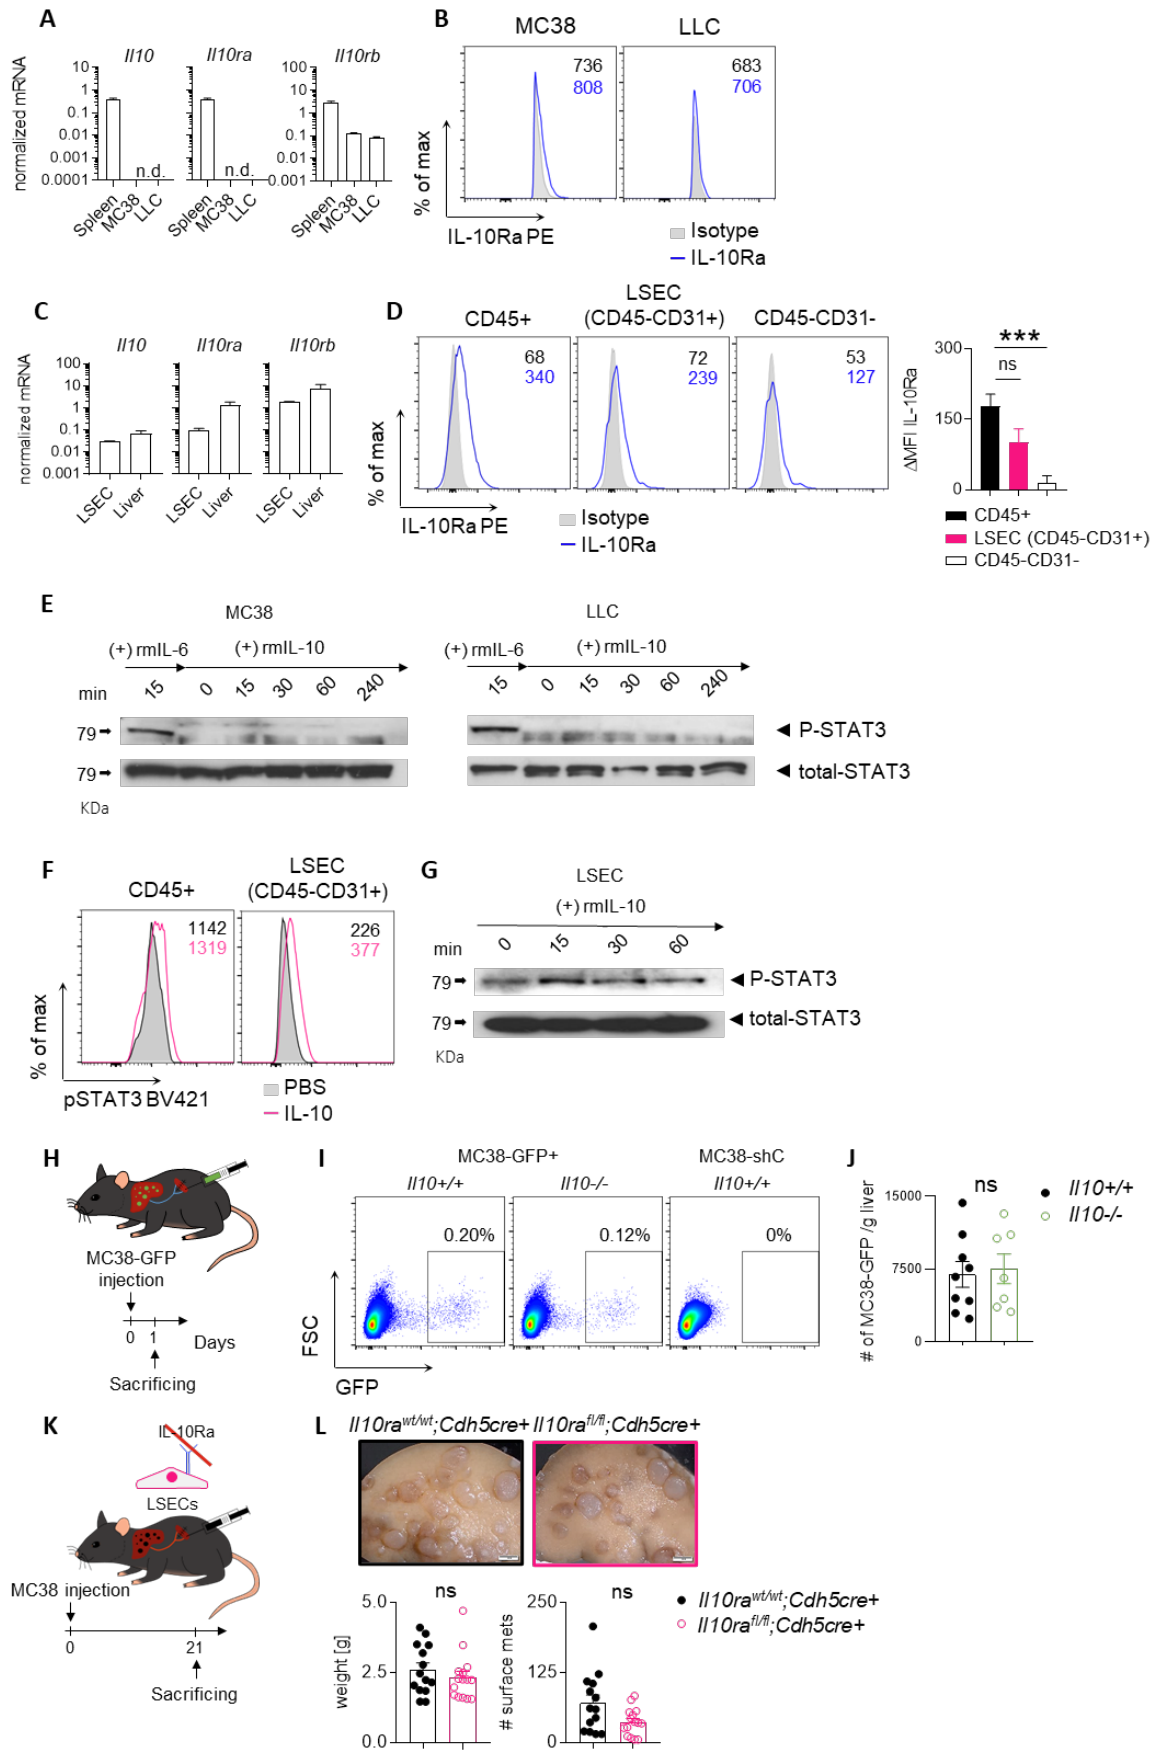

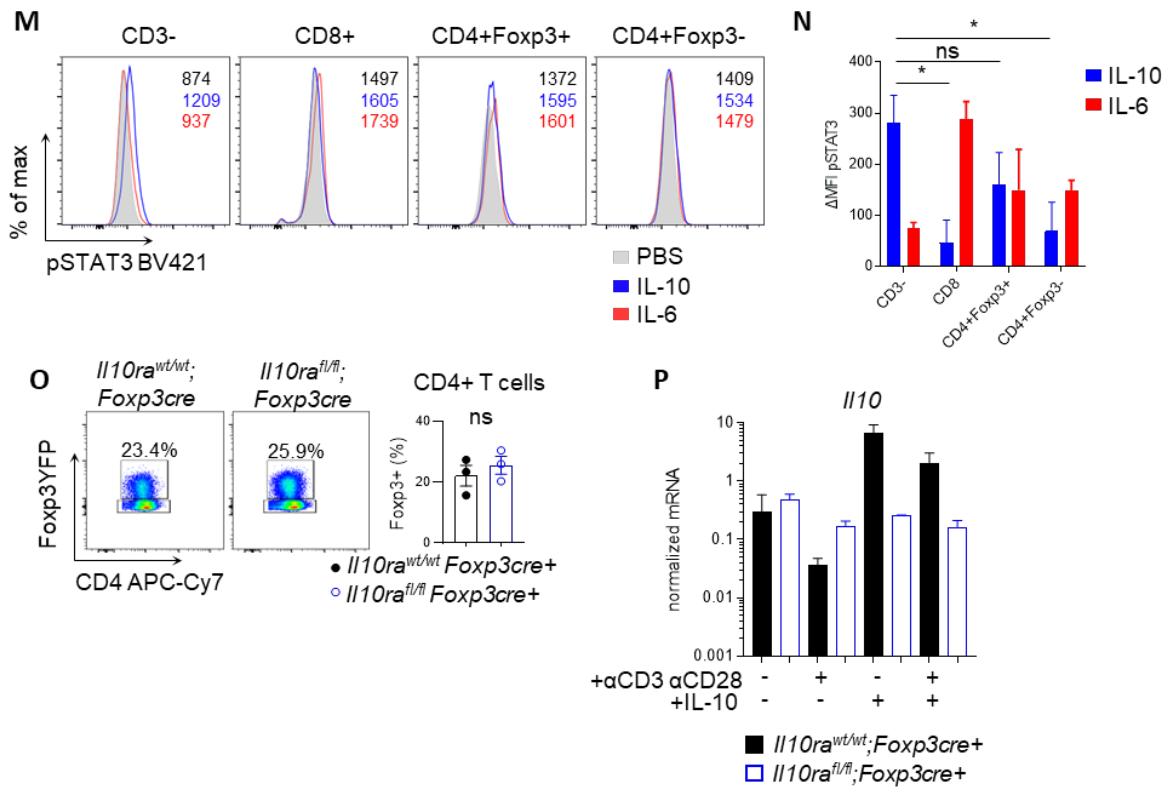

**Fig. S6: IL-10 signaling in cancer cells and LSECs does not affect liver metastasis formation**

(A) mRNA expression of the IL-10 and IL-10 receptor complex in MC38 and LLC cancer cells. (B) MFI of the IL-10Ra expression in MC38 and LLC cancer cells measured using flow cytometry. (C) mRNA expression of IL-10 and IL-10 receptor complex in total liver and LSECs isolated from *Wt* mice. (D) Quantification ( $\Delta$ MFI) of IL-10Ra expression in total immune cells, LSECs and the rest of the cells isolated from *Wt* murine liver. (E) Phosphorylation of STAT3 in MC38 and LLC cancer cells upon *in vitro* IL-6 (10 ng/ $\mu$ l) or IL-10 (10 ng/ $\mu$ l) stimulation at indicated time points measured using Western Blot. (F, G) Phosphorylation of STAT3 in *Wt* LSECs after *in vitro* IL-10 stimulation (10 ng/ $\mu$ l) measured using (F) flow cytometry (after a 60-minute stimulation) or (G) Western blot (at indicated timepoints). (H) MC38-GFP cancer cells were intrasplenically injected into *Il10*<sup>+/+</sup> and *Il10*<sup>-/-</sup> littermates ( $n \geq 7$  mice per group). (I) Representative FACS-plot of extravasated MC38-GFP cells and (J) the number of extravasated MC38-GFP cells. (K) MC38 colon cancer cells were i.s. injected into mice with LSECs-specific IL-10Ra deletion and their littermate controls ( $n \geq 12$  mice per group). (L) Representative images, liver weight as well as number of liver metastasis were analyzed. (M) Representative FACS plot and (N)  $\Delta$ MFI quantification of pSTAT3 staining in hepatic immune cells isolated from *Wt* mice upon IL-10 (10 ng/ $\mu$ l) or IL-6 (10 ng/ $\mu$ l) stimulation *in vitro*. (O) Hepatic Treg frequency within CD4+ T cells and (P) *Il10* level measured using qPCR upon IL-10 and/or antiCD3/CD28 stimulation *in vitro*. Scale bar: 2 mm. Data are presented as mean  $\pm$  SEM. Non-significant (ns):  $p > 0.05$ ; \*\*\*:  $p < 0.001$ , as calculated by Mann-Whitney *U* test or one-way ANOVA (Bonferroni) with Bonferroni post hoc tests. LSECs: liver sinusoidal endothelial cells.

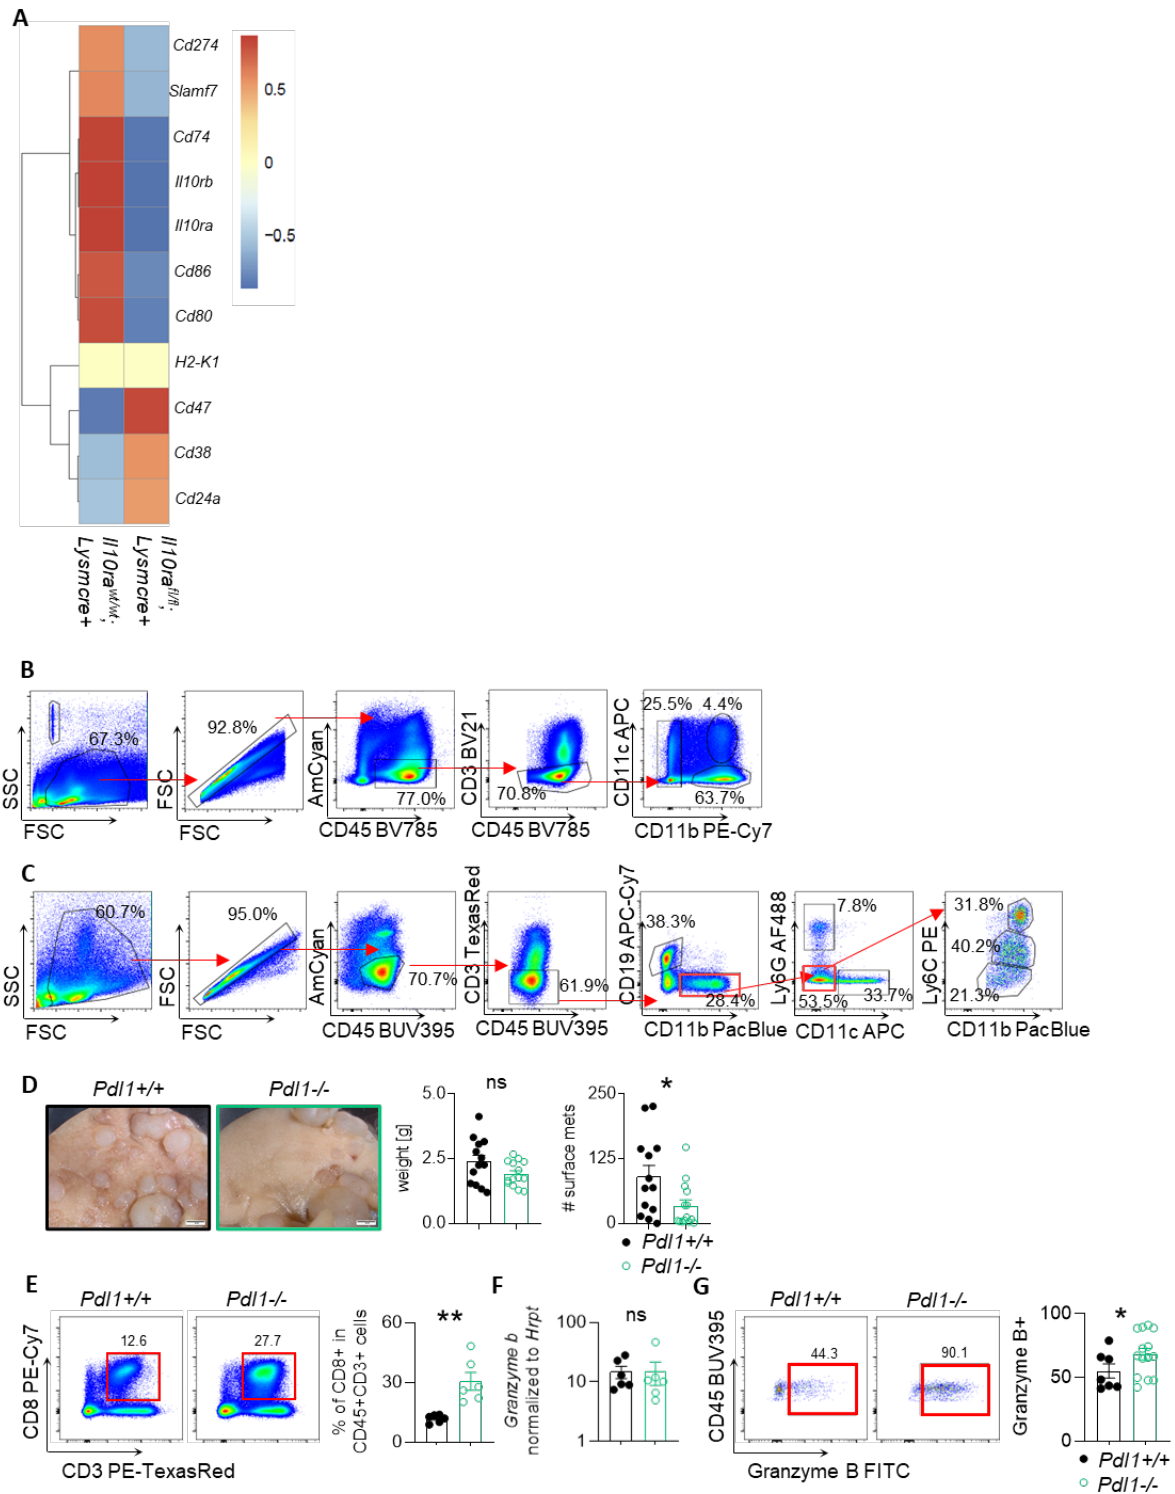

**Fig. S7: PD-L1 deficiency enhances antitumor immunity of CD8+ T cells and reduces liver metastasis**

(A) Bulk sequencing analysis on CD11b+ cells. (B) Gating strategy for Figure 6B. (C) Gating strategy for Figure 6C. (D to G) *Pdl1*<sup>+/+</sup> and *Pdl1*<sup>-/-</sup> mice were i.s. injected MC38 cancer cells (n ≥ 12 mice per group). (D) Livers were harvested 21 days post injection and metastatic burden was assessed. (E) 14 days post injection, representative FACS-plot and the frequency of hepatic CD8+ T cells, as well as

granzyme B level in CD8<sup>+</sup> cells (**F**) before and (**G**) after coculture with MC38 cells *in vitro*.  $n \geq 5$  mice per group. Scale bar: 2 mm. Data are presented as mean  $\pm$  SEM. Non-significant (ns):  $p > 0.05$ ; \*:  $p \leq 0.05$ ; \*\*:  $p < 0.01$ ; \*\*\*:  $p < 0.001$ , as calculated by Mann-Whitney *U* test.

## Supplementary materials and methods

### LSEC isolation

The mice were euthanized and liver perfusion was performed, first by flushing with PBS, and then with 5 mL 0.05% collagenase into the portal vein and vena cava. The liver was sliced into small pieces and digested with 1 mg/ml collagenase and 10 U/ml DNase at 37°C for 25 minutes in RPMI (10% FBS, 1% pen/strep), while shaking. The remaining liver was filtered through a 200- $\mu$ m cell strainer and cell isolation was performed by centrifuging twice at 40 g for 4 minutes and once at 400 g for 20 minutes. An Optiprep (Sigma, Kawasaki, Japan) gradient was used to enrich LSECs from the liver. For isolating LSECs, MACS sorting with anti-CD146 magnetic antibodies was used according to the manufacturer's protocol. LSECs were cultured on collagen-coated plates for 5 days before stimulation.

### Extravasation assay

To perform the extravasation assay, the forced liver metastasis model was used as described above. Here, the difference was the time of euthanization and modified cancer cells. MC38 cells with a green fluorescent protein (MC38-GFP) were used for injections, and livers were harvested after 24 h. The livers were cut, digested and smashed into single cell resolution as mentioned above. Then, the supernatant was collected twice after a 40 g centrifuge for 4 mins. Next, cells in 1:10 dilution were mixed with counting beads (Spherotech Inc) for flow cytometry. A mouse injected with MC38shC cells was used as a negative control.

### Fecal microbiome transfer

Stool was collected either from *C57BL/6J* mice (MB1) or from *Rag-<sup>-/-</sup>* (Yale) mice with a colitogenic microbiome (MB2) [1]. Dissolved stool in brain heart infusion medium (Millipore) was transplanted into the recipient mouse using a gavage needle.

### Mouse colonoscopy

A colonoscopy was performed to determine the severity of the colitis. The degree of colitis (scale 0-15) was determined as published [2], where 0 represents no colitis and 15 represents severe colitis. The mice were under isoflurane anesthesia, and the colonoscopy (Karl Storz) was performed once a week. Colitis severity was scored by two blinded investigators.

### Western Blot

Cells were lysed in lysis buffer on a plate, then scraped and centrifuged at 14,000 g for 5 min. The supernatant was transferred to a new tube. Protein concentration was assessed using the NanoDrop-instrument. Protein samples were equalized with water and Laemmli buffer (60  $\mu$ g/sample) and heated to 95°C for 5 min. Protein samples were run on a 10% Tris/Glycine/SDS-PAGE, subsequently transferred from the gel to a PVDF-membrane using wet-blot electrophoresis for 60 min at 400 mA. The blotted membrane was incubated with blocking buffer (5% milk in PBS-T) for 1 hour, followed

by an incubation with antibody solution (1:1000 dilution) overnight at 4°C. The membrane was washed and incubated with the HRP-conjugated secondary antibody (1:2000) for 1 h. After washing, the blot was developed with chemiluminescent HRP substrate for 5 min before placing a film on the membrane (dark room). The photo film was run through a developer and the ladder was carefully marked on the film.

### **Bulk sequencing**

To generate sequencing libraries, 2 mg RNA from each sample was used according to the manufacturer of NEBNext Ultra™ RNA Library Prep Kit for Illumina (New England Biolabs, Ipswich, MA, USA). cDNA libraries were subsequently sequenced on Illumina HiSeq2500 yielding ~15 million 50 bp single-end reads per sample. To assess the RNA quality, FastQC v. 0.11.5 was used [3]. Alignment to mouse genome draft GRCm38.84 was conducted using STAR v. 2.5.0 [4]. For visualization and hierarchical clustering, using the transcripts per million method was used to normalize the reads, but raw read counts were used for differential expression analysis using DESeq2 v. 1.14 [5].

- [1] **Palm NW, de Zoete MR**, Cullen TW, Barry NA, Stefanowski J, Hao L, et al. Immunoglobulin A coating identifies colitogenic bacteria in inflammatory bowel disease. *Cell* 2014;158:1000-1010.
- [2] Becker C, Fantini MC, Wirtz S, Nikolaev A, Kiesslich R, Lehr HA, et al. In vivo imaging of colitis and colon cancer development in mice using high resolution chromoendoscopy. *Gut* 2005;54:950-954.
- [3] Bolger AM, Lohse M, Usadel B. Trimmomatic: a flexible trimmer for Illumina sequence data. *Bioinformatics* 2014;30:2114-2120.
- [4] Dobin A, Davis CA, Schlesinger F, Drenkow J, Zaleski C, Jha S, et al. STAR: ultrafast universal RNA-seq aligner. *Bioinformatics* 2013;29:15-21.
- [5] Li B, Dewey CN. RSEM: accurate transcript quantification from RNA-Seq data with or without a reference genome. *BMC Bioinformatics* 2011;12:323.

**Table S1: Taqman probes and primer sequences utilized for this study**

| gene                                 | company                  | taqman probe/primer name | sequence (5' → 3')                     |
|--------------------------------------|--------------------------|--------------------------|----------------------------------------|
| <i>Il10<sup>-/-</sup></i>            | Eurofins Genomics        | IL-10fw                  | GCC TTC AGT ATA AAA GGG GGA CC         |
|                                      |                          | IL-10rev                 | GTG GGT GCA GTT ATT GTC TTC CCG        |
|                                      |                          | IL10 neo                 | CCT GCG TGC AAT CCA TCT TG             |
| <i>Il10<sup>flox/flox</sup></i>      | Eurofins Genomics        | IL10fl 932               | CCA GCA TAG AGA GCT TGC ATT ACA        |
|                                      |                          | IL10fl 933               | GAG TCG GTT AGC AGT ATG TTG TCC AG     |
| <i>Foxp3<sup>cre+</sup></i>          | Eurofins Genomics        | Foxp3 KI (F) 936         | AGG ATG TGA GGG ACT ACC TCC TGT A      |
|                                      |                          | Foxp3 KI (Rev) 937       | TCC TTC ACT CTG ATT CTG GCA ATT T      |
|                                      |                          | Foxp3 wt (F)             | CCT AGC CCC TAG TTC CAA CC             |
|                                      |                          | Foxp3 wt (Rev)           | AAG GTT CCA GTG CTG TTG CT             |
| <i>Lysm<sup>cre+</sup></i>           | Eurofins Genomics        | LysM Wt                  | TA CAG TCG GCC AGG CTG AC              |
|                                      |                          | LysM common              | CTT GGG CTG CCA GAA TTT CTC            |
|                                      |                          | LysM Mut                 | CCC AGA AAT GCC AGA TTA CG             |
| <i>Rag<sup>-/-</sup>(Yale)</i>       | Eurofins Genomics        | RagWF                    | GAG GTT CCG CTA CGA CTC TG             |
|                                      |                          | RagR                     | CCG GAC AAG TTT TTC ATC GT             |
|                                      |                          | RagMF                    | TGG ATG TGG AAT GTG TGC GAG            |
| <i>Il10<sup>eGFP</sup></i>           | Eurofins Genomics        | GFP-3                    | AAG TCG TGC TGC TTC ATG TG             |
|                                      |                          | GFP-5                    | ACG TAA ACG GCC ACA AGT TC             |
|                                      |                          | IL10KOF                  | GTG TGT ATT GAG TCT GCT GGA C          |
|                                      |                          | IL10KOR1                 | GTG TGG CCA GCC TTA GAA TAG            |
|                                      |                          | IL10KOR2                 | GGT TGC CTT GAC CAT CGA TG             |
| <i>Foxp3<sup>RFP</sup></i>           | Eurofins Genomics        | FIR1                     | CAA AAC CAA GAA AAG GTG GGC            |
|                                      |                          | FIR2                     | GGA ATG CTC GTC AAG AAG ACA GG         |
|                                      |                          | FIR3                     | CAT CTT GGA GAG TCG GTG TG             |
| <i>Il10<sup>rafflox/flox</sup></i>   |                          | YAK235                   | ACT GCT GTA TCC CCT CAT CT             |
|                                      |                          | YAK236                   | GTG AGC GGA GAT TTT AAC AG             |
| <i>Cdh5<sup>cre+</sup></i>           | Eurofins Genomics        | Cdh5-Cre Fw              | GTC CAA TTT ACT GAC CGT ACA C          |
|                                      |                          | Cdh5-Cre Rev             | CTG TCA CTT GGT CGT GGC AGC            |
| <i>Il17<sup>acre+</sup></i>          | Eurofins Genomics        | 17AyfpF                  | CAA GTG CAC CCA GCA CCA GCT GAT C      |
|                                      |                          | 17AyfpRwt                | CTT AGT GGG TTA GTT TCA TCA CAG C      |
|                                      |                          | 17AyfpCreR               | GCA GCA GGG TGT AGG CAA TGC            |
| <i>a26<sup>floxSTOPflox</sup>YFP</i> | Eurofins Genomics        | Rosa26 Seq1              | AAA GTC GCT CTG AGT TGT TAT            |
|                                      |                          | Rosa26 Seq2              | GCG AAG AGT TTG TCC TCA ACC            |
|                                      |                          | Rosa26 Seq3              | GGA GCG GGA GAA ATG GAT ATG            |
| <i>Cd11<sup>ccre+</sup></i>          | Eurofins Genomics        | 63PC3CreF                | TTC CCG CAG AAC CTG AAG ATG TTC G      |
|                                      |                          | 64PC3CreR                | GCC AGA TTA CGT ATA TCC TGG CAG        |
| <i>Pd1<sup>-/-</sup></i>             | Eurofins Genomics        | B7H1 P2                  | ATT GAC TTT CAG CGT GAT TCG CTT GTA G  |
|                                      |                          | B7H1 P3                  | TTC TAT CGC CTT CTT GAC GAG TTC TTC TG |
|                                      |                          | B7H1 P1                  | AGA ACG GGA GCT GGA CCT GCT TGC GTT AG |
|                                      |                          | B7H1 P2                  | ATT GAC TTT CAG CGT GAT TCG CTT GTA G  |
| <i>Hprt</i>                          | Thermo Fisher Scientific | Mm03024075_m1            |                                        |
| <i>Il10</i>                          | Thermo Fisher Scientific | Mm00439614_m1            |                                        |
| <i>Il10<sup>ra</sup></i>             | Thermo Fisher Scientific | Mm00434151_m1            |                                        |
| <i>Il10<sup>rb</sup></i>             | Thermo Fisher Scientific | Mm00434157_m1            |                                        |
| <i>Granzyme B</i>                    | Thermo Fisher Scientific | Mm00442837_m1            |                                        |

**Table S2: Flow cytometry antibodies utilized for this study**

| <b>Antibody</b>                  | <b>Fluorochrom</b> | <b>company</b> | <b>Cat#</b> | <b>Clone</b>           | <b>RRID</b>    |
|----------------------------------|--------------------|----------------|-------------|------------------------|----------------|
| CD45                             | BV785              | Biolegend      | 103149      | 30-F11                 | AB_2564590     |
| CD45                             | BUV395             | BD             | 564279      | 30-F11                 | AB_2651134     |
| CD3                              | BV421              | Biolegend      | 100228      | 17A2                   | AB_2562553     |
| CD3                              | PE-Dazzle          | Biolegend      | 100246      | 17A2                   | AB_2565883     |
| CD3                              | BV650              | Biolegend      | 100229      | 17A2                   | AB_11204249    |
| CD3                              | BUV395             | BD             | 740268      | 17A2                   | AB_2687927     |
| CD4                              | APC                | Biolegend      | 100412      | GK1.5                  | AB_312697      |
| CD4                              | BUV737             | BD             | 612761      | GK1.5                  | AB_2870092     |
| CD8                              | PE-Cy7             | Biolegend      | 100722      | 53-6.7                 | AB_312761      |
| IL-10Ra                          | PE                 | Biolegend      | 112706      | 1B1.3a                 | AB_313519      |
| Isotype                          | PE                 | Biolegend      | 400408      | RTK2071                | AB_326514      |
| pSTAT3                           | BV421              | Biolegend      | 651010      | 13A3-1                 | AB_2572088     |
| PD-L1                            | BV711              | Biolegend      | 124319      | 10F.9G2                | AB_2563619     |
| PD-1                             | BV421              | Biolegend      | 135218      | 29F.1A12               | AB_2561447     |
| CD11b                            | PacBlue            | Biolegend      | 101224      | M1/70                  | AB_755986      |
| CD11c                            | APC                | Biolegend      | 117312      | N418                   | AB_389328      |
| Ly6G                             | AF488              | Biolegend      | 127625      | 1A8                    | AB_2561339     |
| Ly6C                             | PE                 | Biolegend      | 560592      | AL-21                  | None available |
| CD19                             | APC-Cy7            | Biolegend      | 115530      | 6D5                    | AB_830707      |
| Fixable Viability Dye eFluor 506 | BV510              | Invitrogen     | 65-0866-14  | ig doesnt target a spe | None available |
| PI                               | PE                 | Invitrogen     | P1304MP     | /                      | None available |
| Annexin                          | APC                | Biolegend      | 640920      | /                      | None available |
| TNFa                             | BV421              | Biolegend      | 506328      | MP6-XT22               | AB_2562902     |
| Granzym B                        | FITC               | BioLegend      | 515403      | GB11                   | AB_2114575     |
